# Supplementary material
Source: publisher site journal article supplement (https://www.dovepress.com/article/591017)
Supplement: Supplementary file 1 [file 591017%20Supplementary%20Material.docx]

Supplementary material for

Comprehensive Preclinical Pharmacokinetic Evaluation of S024: A Novel p38/MK2 Pathway Inhibitor for Rheumatoid Arthritis

**Table S1.** Evaluation of S024 Assay Specificity

| **Source Matrix** | **S024 (Analyte)** | | | | **S024-D6 (Internal Standard)** | | | |
| --- | --- | --- | --- | --- | --- | --- | --- | --- |
| **6 Blanks Peak Area** | **6 LLOQ's Peak Area** | **%Contribution in Blank** | **<20.0% ?**  **yes/no** | **6 Blanks Peak Area** | **6 LLOQ's Peak Area** | **%Contribution in Blank** | **<5.0% ?**  **yes/no** |
| SD rat plasma source 1 | 0 | 10900 | 0.0 | yes | 255 | 7620000 | 0.0 | yes |
| SD rat plasma source 2 | 0 | 12300 | 0.0 | yes | 308 | 7830000 | 0.0 | yes |
| SD rat plasma source 3 | 0 | 12000 | 0.0 | yes | 839 | 7480000 | 0.0 | yes |
| SD rat plasma source 4 | 0 | 11500 | 0.0 | yes | 286 | 7620000 | 0.0 | yes |
| SD rat plasma source 5 | 0 | 11500 | 0.0 | yes | 928 | 7800000 | 0.0 | yes |
| SD rat plasma source 6 | 0 | 12900 | 0.0 | yes | 329 | 7920000 | 0.0 | yes |
| Beagle dog plasma source 1 | 723 | 11100 | 6.5 | yes | 1570 | 7420000 | 0.0 | yes |
| Beagle dog plasma source 2 | 0 | 9330 | 0.0 | yes | 736 | 7230000 | 0.0 | yes |
| Beagle dog plasma source 3 | 0 | 9780 | 0.0 | yes | 184 | 6880000 | 0.0 | yes |
| Beagle dog plasma source 4 | 0 | 9720 | 0.0 | yes | 965 | 7320000 | 0.0 | yes |
| Beagle dog plasma source 5 | 0 | 11400 | 0.0 | yes | 243 | 7160000 | 0.0 | yes |
| Beagle dog plasma source 6 | 1110 | 8220 | 13.5 | yes | 334 | 7030000 | 0.0 | yes |

**Table S2.** Interference Evaluation between S024 and S024-D6

| **Sample Identification** | **S024 (Analyte)** | | | | **Sample Identification** | **S024-D6 (Internal Standard)** | | | |
| --- | --- | --- | --- | --- | --- | --- | --- | --- | --- |
| **Peak Area** | **LLOQ Calibrator's Peak Area** | **%Contribution in Blank** | **<20.0% ? yes/no** | **Peak Area** | **LLOQ Calibrator's Peak Area** | **%Contribution in Blank** | **<5.0% ? yes/no** |
| Interference Blank-1 | 0 | 7380 | 0.0 | yes | Interference ULOQ-1 | 3270 | 7390000 | 0.0 | yes |
| Interference Blank-2 | 0 | 0.0 | yes | Interference ULOQ-2 | 2670 | 0.0 | yes |
| Interference Blank-3 | 0 | 0.0 | yes | Interference ULOQ-3 | 4140 | 0.1 | yes |
| Interference Blank-4 | 0 | 0.0 | yes | Interference ULOQ-4 | 4630 | 0.1 | yes |
| Interference Blank-5 | 0 | 0.0 | yes | Interference ULOQ-5 | 3760 | 0.1 | yes |
| Interference Blank-6 | 0 | 0.0 | yes | Interference ULOQ-6 | 3300 | 0.0 | yes |

**Table S3.** Parameters of Calibration Curve for S024 in Rat and Beagle Dog Plasma

| **Medium** | **Slope**  **(a)** | **Intercept (b)** | **Determination Coefficient**  **(R2)** | **LLOQ**  **(ng/mL)** | **ULOQ**  **(ng/mL)** |
| --- | --- | --- | --- | --- | --- |
| **Rat Plasma** | 0.008440 | -0.0007117 | 0.9987 | 0.200 | 300 |
| 0.01042 | -0.0004372 | 0.9987 | 0.200 | 300 |
| 0.009820 | -0.0005503 | 0.9974 | 0.200 | 300 |
| **Beagle Dog Plasma** | 0.007886 | -0.00009905 | 0.9985 | 0.200 | 300 |
| 0.008048 | -0.0002318 | 0.9996 | 0.200 | 300 |
| 0.009545 | 0.0001599 | 0.9984 | 0.200 | 300 |

**Table S4.** Within- and Between-run Accuracy and Precision of S024 in Rat and Beagle Dog Plasma

| **Samples** | **LLOQ  (0.200 ng/mL)** | **Within-run** | | **LQC (0.600 ng/mL)** | **Within-run** | | **MQC  (120 ng/mL)** | **Within-run** | | **HQC (240 ng/mL)** | **Within-run** | |
| --- | --- | --- | --- | --- | --- | --- | --- | --- | --- | --- | --- | --- |
| **%Bias** | **%CV** | **%Bias** | **%CV** | **%Bias** | **%CV** | **%Bias** | **%CV** |
| **Rat Plasma Sample 1** | 0.230 | 15.0 | 7.6 | 0.531 | -11.5 | 5.6 | 121 | 0.8 | 4.3 | 240 | 0.0 | 3.8 |
| **Rat Plasma Sample 2** | 0.201 | 0.5 | 7.9 | 0.579 | -3.5 | 2.6 | 119 | -0.8 | 2.1 | 231 | -3.8 | 3.0 |
| **Rat Plasma Sample 3** | 0.218 | 9.0 | 9.1 | 0.640 | 6.7 | 5.0 | 117 | -2.5 | 4.7 | 231 | -3.8 | 7.4 |
| **Rat Plasma**  **Between-run %Bias** | 8.0 | / | / | -2.8 | / | / | -0.8 | / | / | 5.1 | / | / |
| **Rat Plasma**  **Between-run %CV** | 9.6 | / | / | 9.0 | / | / | 3.9 | / | / | -2.5 | / | / |
| **Beagle Dog Plasma Sample 1** | 0.216 | 8.0 | 7.3 | 0.653 | 8.8 | 3.9 | 137 | 14.2 | 2.1 | 271 | 12.9 | 1.9 |
| **Beagle Dog Plasma Sample 2** | 0.226 | 13.0 | 6.2 | 0.639 | 6.5 | 5.7 | 133 | 10.8 | 1.5 | 258 | 7.5 | 1.7 |
| **Beagle Dog Plasma Sample 3** | 0.192 | -4.0 | 14.7 | 0.530 | -11.7 | 10.6 | 113 | -5.8 | 8.3 | 221 | -7.9 | 5.9 |
| **Beagle Dog Plasma**  **Between-run %Bias** | 5.5 | / | / | 1.2 | / | / | 6.7 | / | / | 4.2 | / | / |
| **Beagle Dog Plasma**  **Between-run %CV** | 11.6 | / | / | 11.3 | / | / | 9.3 | / | / | 9.2 | / | / |

**Table S5.** Matrix Effect of S024 in Rat and Beagle Dog Plasma

| **Medium** | **Concentration (ng/mL)** | **Internal standard Normalized Matrix Factor/%** | **%CV (IS Normalized MF) of each level** | **%CV (IS Normalized MF) of all level** |
| --- | --- | --- | --- | --- |
| **Rat Plasma** | 0.4 | 96.95 ± 7.93 | 8.2 | 7.6 |
| 300 | 97.07 ± 7.57 | 7.8 |
| **Beagle Dog Plasma** | 0.4 | 98.53 ± 7.01 | 7.1 | 6.4 |
| 300 | 93.02 ± 4.02 | 4.3 |

**Table S6.** Extraction Recovery of S024 in SD Rat and Beagle Dog Plasma

| **Species** | **Samples** | **Recovery (%)** | **%CV*** | **%CV of all level** |
| --- | --- | --- | --- | --- |
| **SD Rat** | **LQC** | 82.03 ± 4.70 | 5.7 | 3.4 |
| **MQC** | 80.60 ± 0.69 | 0.9 |
| **HQC** | 80.13 ± 2.20 | 2.7 |
| **Beagle Dog** | **LQC** | 47.47 ± 1.70 | 3.6 | 3.3 |
| **MQC** | 44.70 ± 0.10 | 0.2 |
| **HQC** | 46.63 ± 0.59 | 1.3 |

**Table S7.** Stability of S024 Under Different Storage Conditions (n=3)

| **Medium** | **Stability Studies** | **Concentration (ng/mL)** | **Mean Recovery ± SD (ng/mL)** | **Bias (%)** | **CV (%)** |
| --- | --- | --- | --- | --- | --- |
| **Rat Plasma** | **Short term (8 hours at room temperature)** | 0.6 | 0.555 **±** 0.0146 | -7.5 | 2.6 |
| 240 | 248 **±** 2.52 | 3.3 | 1.0 |
| **Rat Plasma** | **Long term (−80 °C, 13 d)** | 0.6 | 0.580 **±** 0.00850 | -3.3 | 1.5 |
| 240 | 250 **±** 3.61 | 4.2 | 1.4 |
| **Rat Plasma** | **Freeze/thaw (−80 °C and RT, 5 cycles)** | 0.6 | 0.568 ± 0.0255 | -5.3 | 4.5 |
| 240 | 246 ± 1.00 | 2.5 | 0.4 |
| **Rat Plasma** | **In Processed Samples (10 °C, 60 h)** | 0.6 | 0.579 ± 0.0318 | -3.5 | 5.5 |
| 240 | 238 ± 3.61 | 0.8 | 1.5 |
| **Beagle Dog Plasma** | **Short term (8 hours at room temperature)** | 0.6 | 0.564 **±** 0.0153 | -6.0 | 2.7 |
| 240 | 241 ± 3.06 | 0.4 | 1.3 |
| **Beagle Dog Plasma** | **Long term (−80 °C, 13 d)** | 0.6 | 0.530 **±** 0.0165 | -11.7 | 3.1 |
| 240 | 243 ± 5.69 | 1.3 | 2.3 |
| **Beagle Dog Plasma** | **Freeze/thaw (−80 °C and RT, 5 cycles)** | 0.6 | 0.536 ± 0.0362 | -10.7 | 6.8 |
| 240 | 244 ± 2.65 | 1.7 | 1.1 |
| **Beagle Dog Plasma** | **In Processed Samples (10 °C, 60 h)** | 0.6 | 0.561 ± 0.0627 | -6.5 | 11.2 |
| 240 | 227 ± 11.4 | -5.4 | 5.0 |

**Table S8.** Mean pharmacokinetic parameters of S024 in male and female SD rats following intravenous and oral Administration of S024

| **Group** | **1** | | **2** | | **3** | | **4 (Day 1)** | | **4 (Day 7)** | | **5** | |
| --- | --- | --- | --- | --- | --- | --- | --- | --- | --- | --- | --- | --- |
| **Dose Route** | **IV bolus** | | **PO** | | **PO** | | **PO** | | **PO** | | **PO** | |
| **Dose Level (mg/kg)** | **1** | | **0.3** | | **1** | | **1** | | **1** | | **3** | |
| **PK Parameters** | **Male** | **Female** | **Male** | **Female** | **Male** | **Female** | **Male** | **Female** | **Male** | **Female** | **Male** | **Female** |
| **C0 or Cmax (ng/mL)** | 1280 | 1590 | 88.3 | 152 | 281 | 551 | 209 | 486 | 152 | 369 | 706 | 1590 |
| **Tmax (h)** | **--** | **--** | 0.333 | 0.500 | 0.333 | 0.417 | 1.33 | 0.667 | 0.833 | 1.00 | 0.417 | 0.500 |
| **Cl** **(mL/min/kg)** | 35.0 | 14.3 | -- | -- | -- | -- | -- | -- | -- | -- | -- | -- |
| **Vdss (L/kg)** | 1.12 | 1.03 | -- | -- | -- | -- | -- | -- | -- | -- | -- | -- |
| **AUC0-last (ng·h/mL)** | 500 | 1190 | 96.1 | 285 | 280 | 949 | 420 | 1020 | 460 | 1250 | 1020 | 3590 |
| **AUC0-inf (ng·h/mL)** | 501 | 1190 | 97.3 | 287 | 282 | 953 | 423 | 1020 | 461 | 1250 | 1020 | 3600 |
| **T1/2 (h)** | 2.82 | 4.77 | 3.71 | 3.40 | 2.92 | 3.96 | 2.59 | 3.50 | 1.67 | 2.94 | 2.94 | 2.70 |
| **Bioavailability (%)** | **--** | **--** | 64.7 | 80.4 | 56.3 | 80.1 | 84.4 | 85.7 | -- | -- | 67.9 | 101 |

**Table S9.** Mean pharmacokinetic parameters of S024 in male and female beagle dogs following intravenous and oral Administration of S024

| **Group** | **1** | | **2** | | **3** | | **4 (Day 1)** | | **4 (Day 7)** | | **5** | |
| --- | --- | --- | --- | --- | --- | --- | --- | --- | --- | --- | --- | --- |
| **Dose Route** | **IV bolus** | | **PO** | | **PO** | | **PO** | | **PO** | | **PO** | |
| **Dose Level (mg/kg)** | **0.3** | | **0.1** | | **0.3** | | **0.3** | | **0.3** | | **1** | |
| **PK Parameters** | **Male** | **Female** | **Male** | **Female** | **Male** | **Female** | **Male** | **Female** | **Male** | **Female** | **Male** | **Female** |
| **C0 or Cmax (ng/mL)** | 436 | 387 | 22.6 | 10.7 | 106 | 85.5 | 82.3 | 56.6 | 108 | 91.2 | 349 | 369 |
| **Tmax (h)** | **--** | **--** | 0.333 | 0.667 | 0.500 | 0.583 | 0.500 | 0.667 | 0.417 | 0.500 | 0.667 | 0.500 |
| **Cl** **(mL/min/kg)** | 16.6 | 19.1 | -- | -- | -- | -- | -- | -- | -- | -- | -- | -- |
| **Vdss (L/kg)** | 1.89 | 1.70 | -- | -- | -- | -- | -- | -- | -- | -- | -- | -- |
| **AUC0-last (ng·h/mL)** | 300 | 264 | 63.3 | 34.0 | 238 | 198 | 328 | 193 | 341 | 215 | 876 | 744 |
| **AUC0-inf (ng·h/mL)** | 302 | 265 | 64.8 | 35.4 | 240 | 200 | 332 | 195 | 344 | 218 | 877 | 749 |
| **T1/2 (h)** | 5.90 | 2.28 | 3.92 | 3.89 | 3.59 | 3.06 | 3.69 | 4.07 | 3.48 | 5.16 | 3.37 | 2.88 |
| **Bioavailability (%)** | **--** | **--** | 64.4 | 40.1 | 79.5 | 75.5 | 110 | 73.6 | -- | -- | 87.1 | 84.8 |

**Table S10.** Mean plasma concentrations, tissue concentrations and pharmacokinetic parameters of S024 in male SD rats

| **Time（h） Matrix** | **Concentration（ng/mL or ng/g）** | | | | **Parameters** | | |
| --- | --- | --- | --- | --- | --- | --- | --- |
| **0.25** | **1** | **8** | **24** | **Cmax (ng/mL or ng/g)** | **Tmax (h)** | **AUC0-last (ng•h/mL or ng•h/g )** |
| **Plasma** | 311 | 169 | 2.25 | ND | 311 | 0.250 | 484 |
| **Blood** | 275 | 129 | 3.16 | 1.15 | 275 | 0.250 | 448 |
| **Liver** | 978 | 234 | 32.2 | 9.47 | 978 | 0.250 | 1520 |
| **Kidney** | 617 | 359 | 50.2 | 31.5 | 617 | 0.250 | 2180 |
| **Stomach** | 2770 | 1320 | 42.3 | 20.7 | 2770 | 0.250 | 4900 |
| **Lung** | 203 | 122 | 21.6 | 9.86 | 203 | 0.250 | 790 |
| **Small Intestine** | 2870 | 715 | 62.2 | 27.4 | 2870 | 0.250 | 4070 |
| **Large Intestine** | 237 | 463 | 156 | 22.8 | 463 | 1.00 | 3380 |
| **Heart** | 250 | 155 | 34.1 | 21.3 | 250 | 0.250 | 1170 |
| **Muscle** | 190 | 126 | 30.5 | 20.4 | 190 | 0.250 | 1010 |
| **Spleen** | 369 | 184 | 86.3 | 51.0 | 369 | 0.250 | 2220 |
| **Fat** | 218 | 121 | 4.47 | ND | 218 | 0.250 | 398 |
| **Brain** | 5.98 | 6.48 | ND | ND | ND | ND | ND |
| **Marrow** | 340 | 210 | 81.6 | 61.9 | 340 | 0.250 | 2340 |
| **Eyeball** | 37.3 | 30.2 | 7.07 | 4.42 | 37.3 | 0.250 | 232 |
| **Pancreas** | 207 | 121 | 19.6 | 13.3 | 207 | 0.250 | 796 |
| **Submaxillary Lymph Nodes** | 207 | 181 | 62.6 | 36.6 | 207 | 0.250 | 1730 |
| **Thymus** | 187 | 146 | 62.7 | 37.4 | 187 | 0.250 | 1620 |
| **Epididymis** | 84.6 | 72.9 | 16.6 | 8.81 | 84.6 | 0.250 | 533 |
| **Testicle** | 23.1 | 21.5 | 13.8 | 9.73 | 23.1 | 0.250 | 328 |

**Table S11.** Mean plasma concentrations, tissue concentrations and pharmacokinetic parameters of S024 in female SD rats

| **Time（h） Matrix** | **Concentration（ng/mL or ng/g）** | | | | **Parameters** | | |
| --- | --- | --- | --- | --- | --- | --- | --- |
| **0.25** | **1** | **8** | **24** | **Cmax (ng/mL or ng/g)** | **Tmax (h)** | **AUC0-last (ng•h/mL or ng•h/g )** |
| **Plasma** | 465 | 533 | 16.0 | 0.665 | 533 | 1.00 | 1540 |
| **Blood** | 308 | 392 | 13.4 | 1.77 | 392 | 1.00 | 1180 |
| **Liver** | 1040 | 717 | 70.5 | 20.7 | 1040 | 0.250 | 3380 |
| **Kidney** | 751 | 785 | 76.6 | 49.2 | 785 | 1.00 | 3790 |
| **Stomach** | 3390 | 1650 | 48.8 | 25.7 | 3390 | 0.250 | 6000 |
| **Lung** | 190 | 183 | 31.6 | 20.5 | 190 | 0.250 | 1180 |
| **Small Intestine** | 1910 | 769 | 88.7 | 51.4 | 1910 | 0.250 | 4480 |
| **Large Intestine** | 387 | 862 | 347 | 35.5 | 862 | 1.00 | 6660 |
| **Heart** | 413 | 341 | 50.9 | 31.6 | 413 | 0.250 | 2050 |
| **Muscle** | 246 | 293 | 39.6 | 22.7 | 293 | 1.00 | 1610 |
| **Spleen** | 470 | 474 | 104 | 79.6 | 474 | 1.00 | 3580 |
| **Fat** | 259 | 293 | 12.0 | 4.91 | 293 | 1.00 | 982 |
| **Brain** | 10.2 | 12.8 | 2.72 | ND | 12.8 | 1.00 | 55.5 |
| **Marrow** | 402 | 404 | 81.3 | 82.5 | 404 | 1.00 | 3070 |
| **Eyeball** | 58.9 | 57.7 | 9.65 | 5.60 | 58.9 | 0.250 | 358 |
| **Pancreas** | 292 | 376 | 32.9 | 17.1 | 376 | 1.00 | 1660 |
| **Submaxillary Lymph Nodes** | 303 | 356 | 71.9 | 52.4 | 356 | 1.00 | 2510 |
| **Thymus** | 282 | 306 | 71.6 | 51.4 | 306 | 1.00 | 2360 |
| **Uterus** | 168 | 265 | 40.5 | 24.1 | 265 | 1.00 | 1530 |
| **Ovary** | 235 | 260 | 54.3 | 32.2 | 260 | 1.00 | 1810 |

**Table S12.** Metabolic Stability Parameters of S024 in CD-1 Mouse, SD Rat, Beagle Dog, Cynomolgus Monkey, and Human Hepatocytes

| **Species** | **T1/2 (min)** | **CLint(hep)  (μL/min/106 cells)** | **CLint(liver) (mL/min/kg)** |
| --- | --- | --- | --- |
| **CD-1 mouse** | 51.3 | 27.0 | 320.9 |
| **SD rat** | 148.2 | 9.4 | 43.8 |
| **Beagle dog** | >372.7 | <3.7 | <25.6 |
| **Cynomolgus monkey** | 193.9 | 7.1 | 25.7 |
| **Human** | >372.7 | <3.7 | <10.3 |

**Table S13.** %Inhibition of Positive control Metabolism in Human Liver Microsomes by CYP-Selective Chemical Inhibitors

| **CYP** | **Selective Chemical Inhibitor** | **Probe Substrate** **(Positive Control)** | **%Inhibition** |
| --- | --- | --- | --- |
| 1A2 | α-Naphthoflavone | Phenacetin | 90.2 |
| 2B6 | Ticlopidine | Bupropion | 90.2 |
| 2C8 | Montelukast | Amodiaquine | 81.8 |
| 2C9 | Sulfaphenazole | Diclofenac | 92.6 |
| 2C19 | (S)-(+)-N-3-benzylnirvanol | (S)-Mephenytoin | 89.1 |
| 2D6 | Quinidine | Dextromethorphan | 90.4 |
| 3A | Ketoconazole | Testosterone | 94.9 |

**Table S14.** %Inhibition of M6 and M3 in Human Liver Microsomes by CYP-Selective Chemical Inhibitors

| **CYP Isoform** | **Selective Chemical Inhibitor** | **Analyte** | **Conc. (µM)** | **Incubation Time (min)** | **Mean Ratio** | **SD** | **%Inhibition** |
| --- | --- | --- | --- | --- | --- | --- | --- |
| 2B6 | Ticlopidine | M6 | 5.00 | 20 | 0.0225 | 0.00173 | 0.3 |
| 2C8 | Montelukast | 2.00 | 0.00472 | 0.000530 | 79.1 |
| 2C9 | Sulfaphenazole | 10.0 | 0.0204 | 0.00143 | 9.6 |
| 2C19 | (S)-(+)-N-3-benzylnirvanol | 2.00 | 0.0209 | 0.00117 | 7.2 |
| 2D6 | Quinidine | 2.00 | 0.0185 | 0.000653 | 17.7 |
| 3A | Ketoconazole | 1.00 | 0.0125 | 0.00123 | 44.4 |
| Vehicle Control | No inhibitor | 0 | 0.0225 | 0.00178 | / |
| / | No inhibitor | 0 | 0 | 0 | 0 | / |
| 1A2 | α-Naphthoflavone | 3.00 | 20 | 0.0181 | 0.000519 | 4.5 |
| Vehicle Control | No inhibitor | 0 | 0.0189 | 0.00115 | / |
| / | No inhibitor | 0 | 0 | 0 | 0 | / |
| 2B6 | Ticlopidine | M3 | 5.00 | 20 | 0.0311 | 0.00157 | -6.6 |
| 2C8 | Montelukast | 2.00 | 0.0275 | 0.00193 | 11.1 |
| 2C9 | Sulfaphenazole | 10.0 | 0.0277 | 0.00110 | 10.1 |
| 2C19 | (S)-(+)-N-3-benzylnirvanol | 2.00 | 0.0294 | 0.00245 | 2.0 |
| 2D6 | Quinidine | 2.00 | 0.0272 | 0.00146 | 12.7 |
| 3A | Ketoconazole | 1.00 | 0.0122 | 0.000984 | 86.8 |
| Vehicle Control | No inhibitor | 0 | 0.0298 | 0.00181 | / |
| / | No inhibitor | 0 | 0 | 0.00957 | 0.00155 | / |
| 1A2 | α-Naphthoflavone | 3.00 | 20 | 0.0304 | 0.000266 | -11.8 |
| Vehicle Control | No inhibitor | 0 | 0.0283 | 0.00129 | / |
| / | No inhibitor | 0 | 0 | 0.0102 | 0.000309 | / |
